# Supplementary material
Source: Springer Nature journal article supplement (https://www.springermedizin.de/resource/supplementary/12939_2010_176_MOESM1_ESM.pdf/9551656)
Supplement: MOESM1 [file 9551656]

Potentially relevant articles  
identified and screened by title  
*n* = 1430

Total articles excluded *n* = 1128  
Duplicate records *n* = 84  
Not pharmaceutical policy *n* = 1044

Articles to be randomly sorted for  
scoping  
*n* = 302

Articles excluded via random sort  
*n* = 151 (50%)

Full articles retrieved for more in-  
depth evaluation  
*n* = 151

Total articles excluded *n* = 66  
Descriptive or no original data *n* = 48  
Not pharmaceutical policy *n* = 16  
Not available in English *n* = 2

Articles mapped according to coding  
rubric  
*n* = 85

Review  
*n* = 40

Qualitative  
*n* = 14

Quantitative  
*n* = 28

Theory  
*n* = 3
